# Supplementary material
Source: MDPI journal article supplement (https://www.mdpi.com/2073-445X/12/1/255)
Supplement: s1 [file s1 › land-2133351-supplementary.pdf]

# Supplementary Materials: Modelling the Whole Profile Soil Organic Carbon Dynamics Considering Soil Redistribution under Future Climate Change and Landscape Projections over the Lower Hunter Valley, Australia

Yuxin Ma, Budiman Minasny, Valérie Viaud, Christian Walter, Brendan Malone and Alex McBratney

Table S1. Relative differences in percentiles (10<sup>th</sup>, 50<sup>th</sup> and 90<sup>th</sup>) for observed SOC stocks in 2016 in five fields and entire study area (t C ha<sup>-1</sup>).

| Location          | 0-30 cm          |                  |                  | 30-60 cm         |                  |                  | 60-100 cm        |                  |                  |
|-------------------|------------------|------------------|------------------|------------------|------------------|------------------|------------------|------------------|------------------|
|                   | 10 <sup>th</sup> | 50 <sup>th</sup> | 90 <sup>th</sup> | 10 <sup>th</sup> | 50 <sup>th</sup> | 90 <sup>th</sup> | 10 <sup>th</sup> | 50 <sup>th</sup> | 90 <sup>th</sup> |
| Benwarin          | 50.6             | 70.2             | 96.6             | 16.5             | 23.0             | 27.3             | 14.4             | 19.2             | 26.8             |
| Breamore          | 16.4             | 26.0             | 33.2             | 6.0              | 12.4             | 17.7             | 3.3              | 10.1             | 18.7             |
| Draytons          | 26.1             | 34.2             | 46.4             | 15.7             | 21.1             | 30.3             | 15.4             | 25.4             | 33.6             |
| Scarborough       | 53.8             | 69.0             | 89.0             | 20.3             | 29.4             | 53.5             | 11.0             | 21.4             | 34.8             |
| Talavera          | 36.8             | 62.3             | 113.3            | 15.4             | 26.8             | 58.1             | 14.8             | 26.6             | 41.7             |
| Entire Study area | 28.4             | 55.7             | 94.5             | 9.6              | 22.8             | 49.2             | 5.6              | 18.5             | 35.1             |

Table S2. Eight selected models from the 40 CMIP5 models.

| Eight models | Institute            | Climate Futures                                 |
|--------------|----------------------|-------------------------------------------------|
| ACCESS1.0    | CSIRO-BOM, Australia | Maximum consensus for many regions              |
| CanESM2      | CCCMA, Canada        |                                                 |
| CESM1-CAM5   | NSF-DOE-NCAR, USA    | Hotter and wetter, or hotter and least drying   |
| CNRM-CM5     | CNRM-CERFACS, France | Hot /wet end of the range in Southern Australia |
| GFDL-ESM2M   | NOAA, GFDL, USA      | Hotter and drier model for many clusters        |
| HadGEM2-CC   | MOHC, UK             | Maximum consensus for many regions              |
| MIROC5       | JAMSTEC, Japan       | Low warming wetter model                        |
| NorESM1-M    | NCC, Norway          | Low warming wettest representative model        |

Table S3 Characteristic of mean monthly rainfall (mm) and temperature (°C) for the BAU and climate change scenarios (period 2017–2045).

|                       | BAU   | Climate change |        |
|-----------------------|-------|----------------|--------|
|                       |       | RCP4.5         | RCP8.5 |
| Mean rainfall (mm)    | 95.59 | 63.74          | 64.14  |
| Mean temperature (°C) | 18.93 | 18.39          | 18.62  |

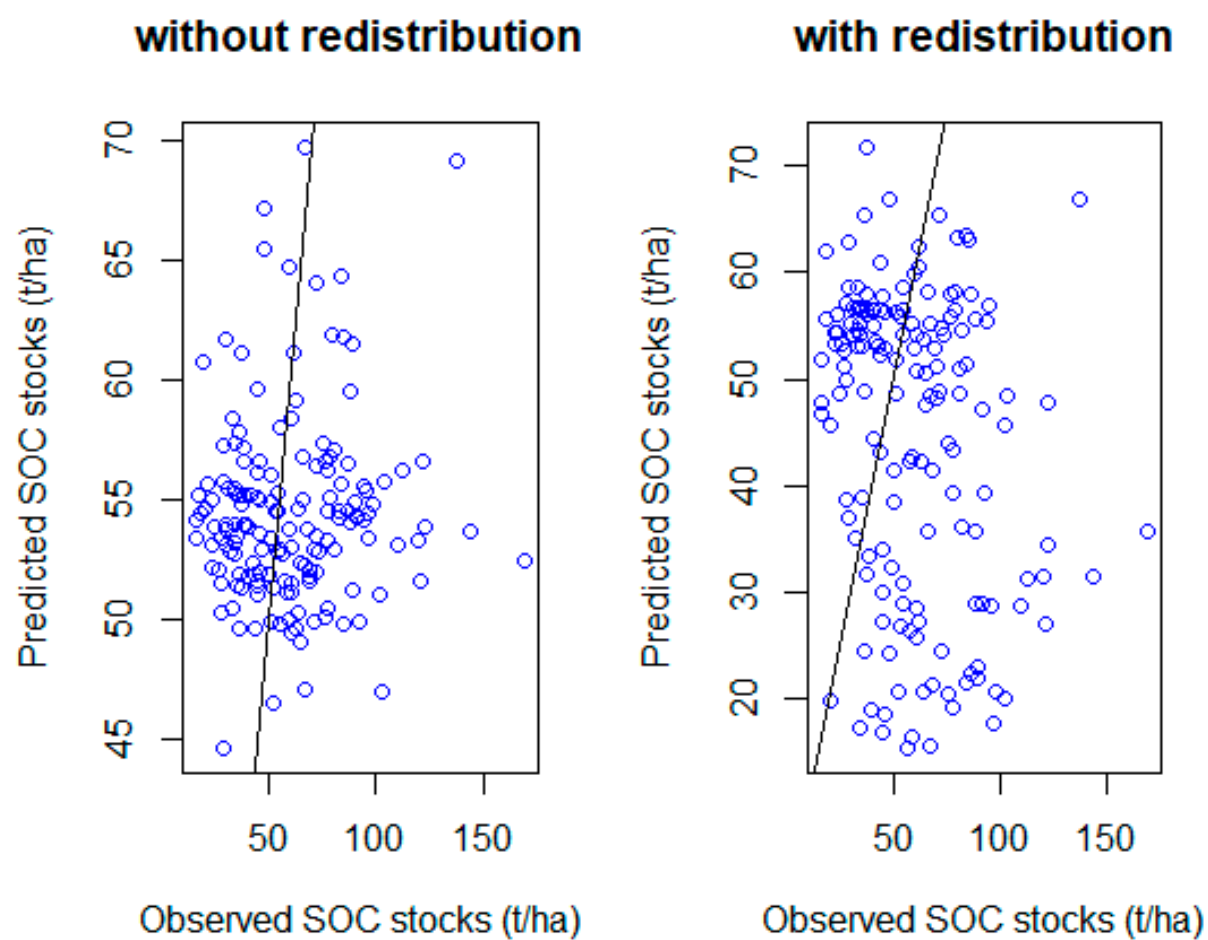

Figure S1. Fits of observed vs. modelled SOC stocks in the 0–30 cm soil layer in 2016 for the entire study area. The line is 1:1 line.

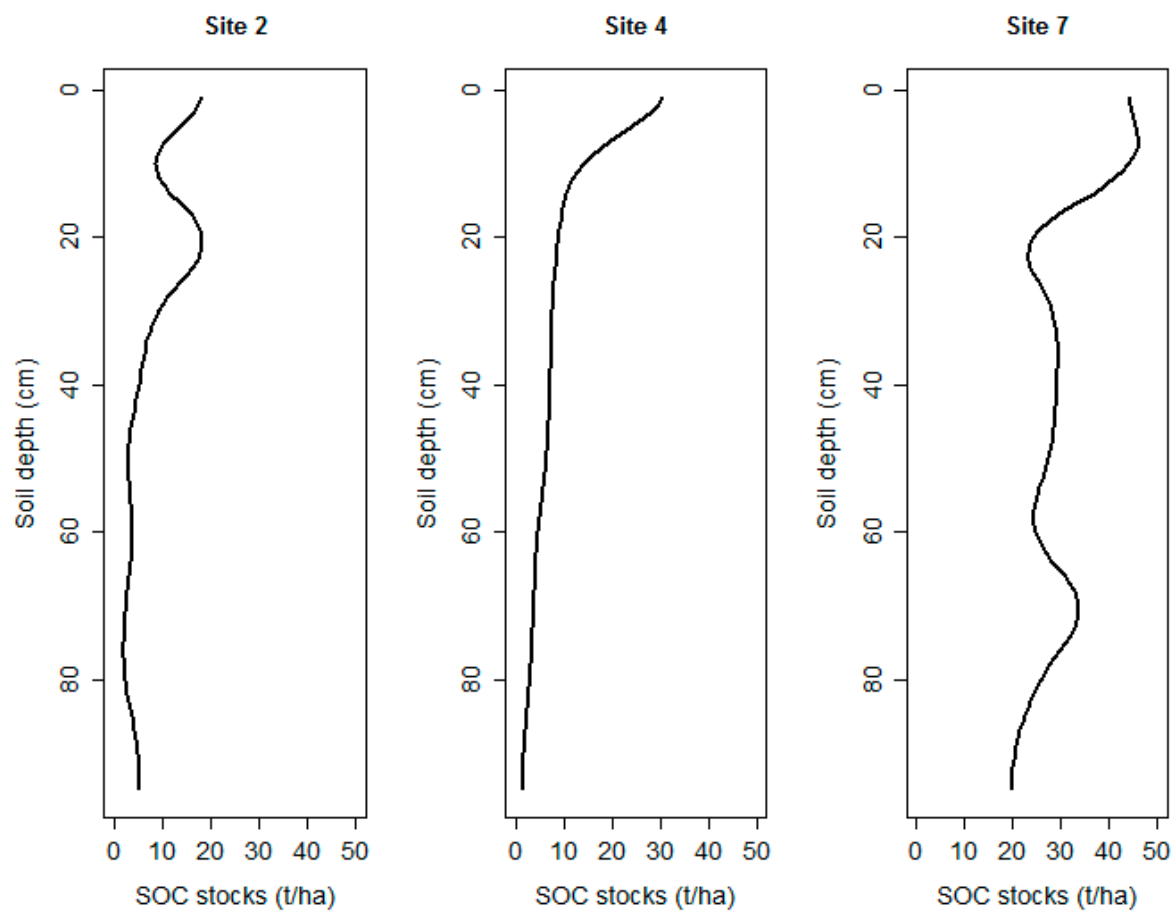

Figure S2. SOC stocks of three profiles (site 2 (top of hill), site 4 (middle) and site 7 (bottom)).

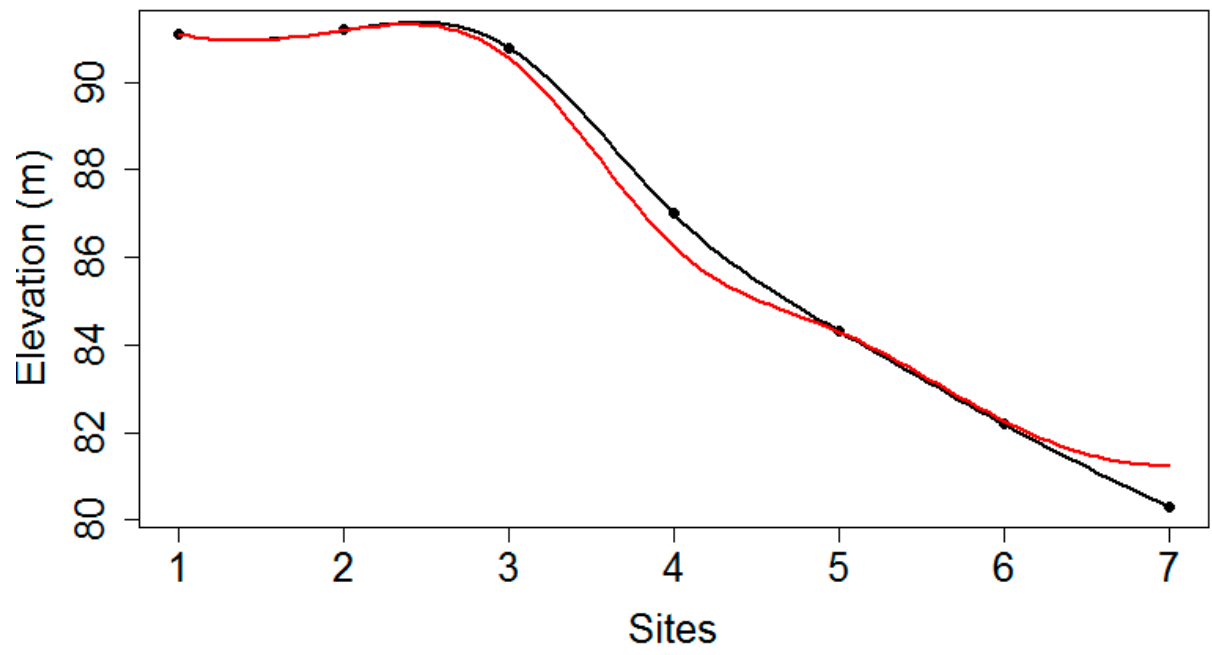

Figure S3. Elevation change of the transect for 100 years. The black line is the current elevation and the red line is simulated elevation after 100 years.

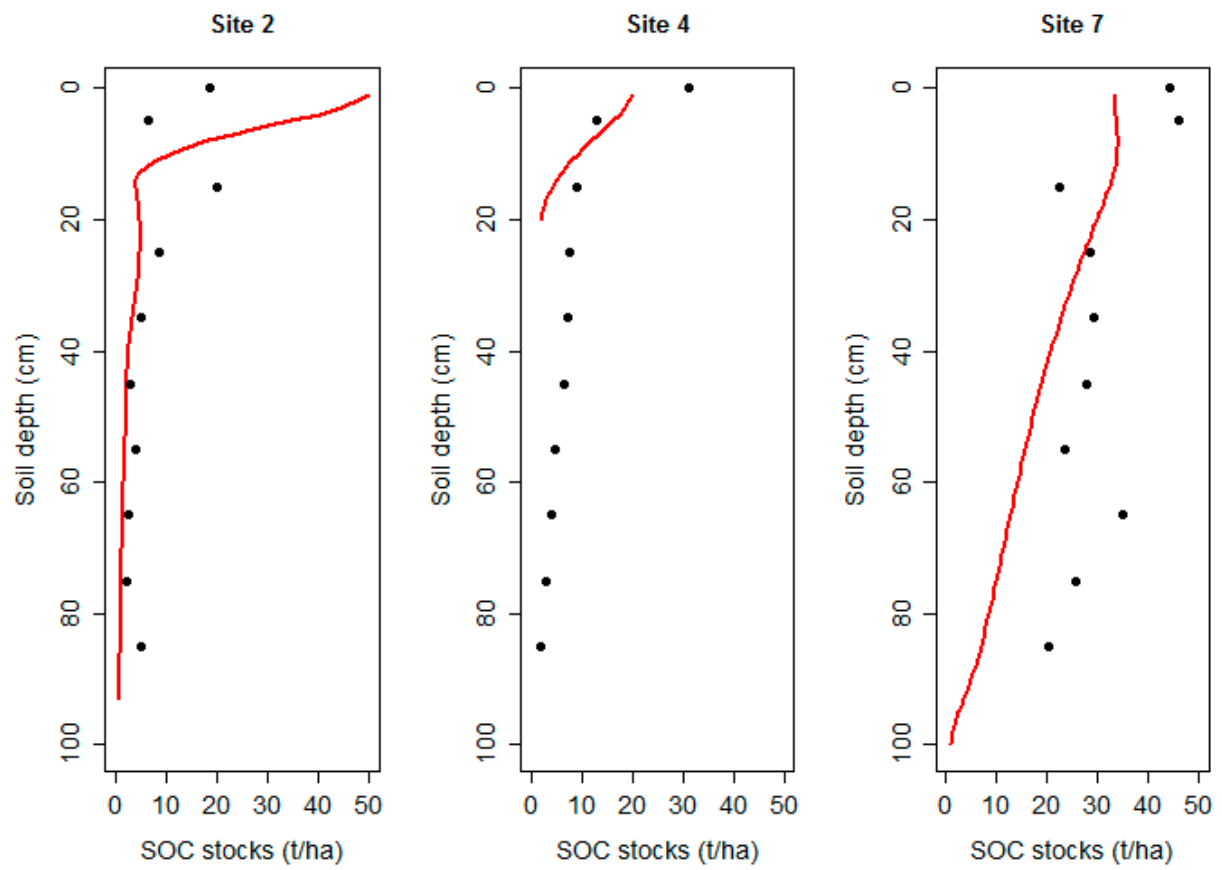

Figure S4. Comparison between observations (black dots) and simulations after 100 years for site 2, 4 and 7 (red line).

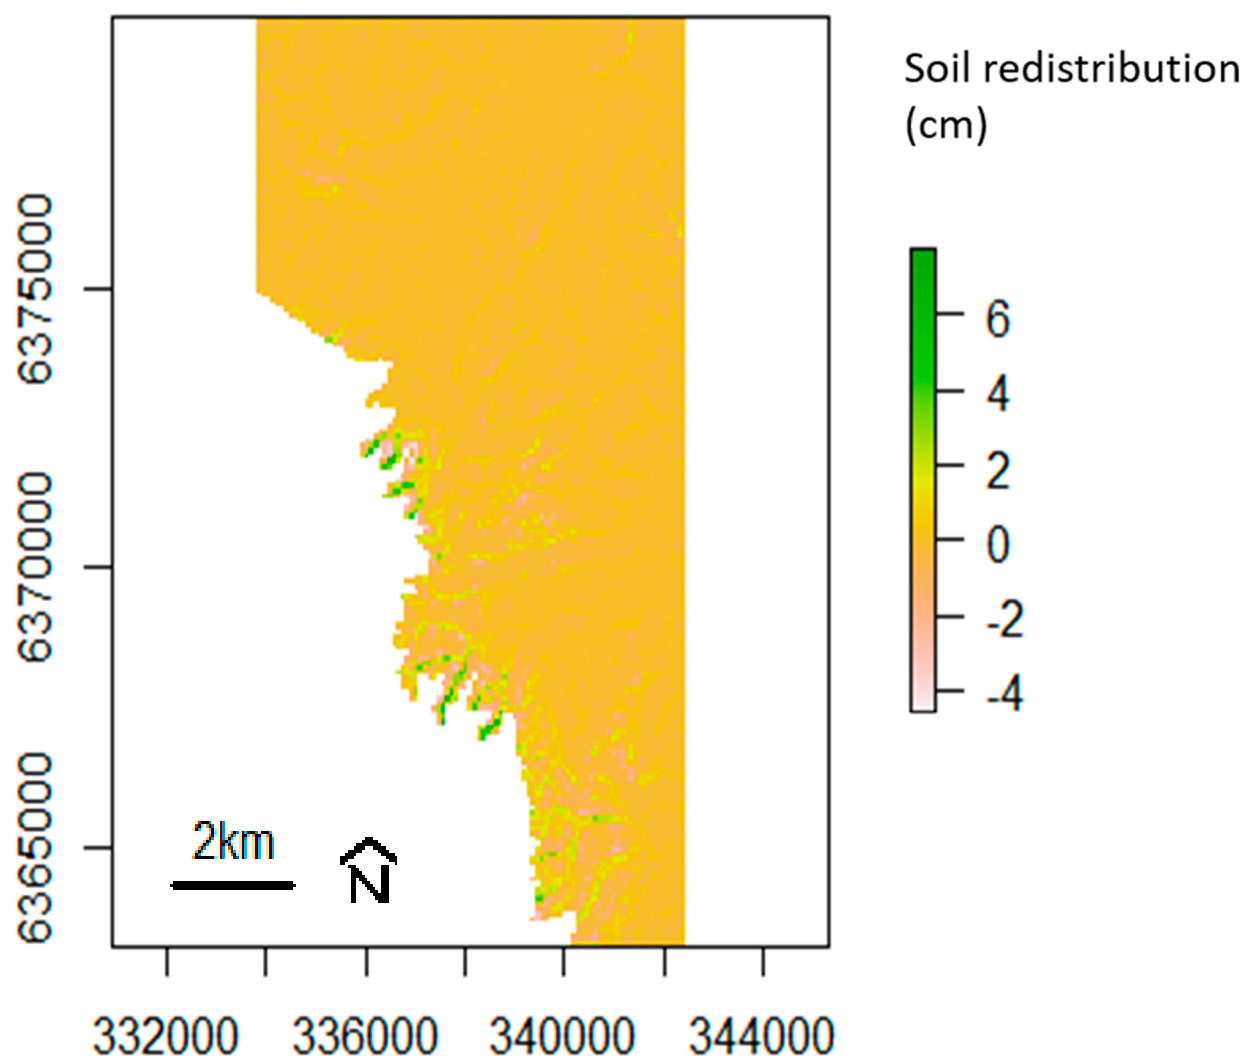

Figure S5. Maps of stable areas, areas with net soil erosion and net deposition.
